# Supplementary material for: Well-defined hollow tube@sheets NiCo2S4 core–shell nanoarrays for ultrahigh capacitance supercapacitor
Source: Royal Society of Chemistry journal article supplement (doi:10.1039/d1dt02666f), 2021-01-01
Supplement: d1dt02666f1.pdf [file d1dt02666f1.pdf]

## Supporting Information

### Well-defined hollow tube@sheets $\text{NiCo}_2\text{S}_4$ core-shell nanoarrays for ultrahigh capacitance supercapacitor

Jiachao Zhou, Yingchao Wang, Jiaojiao Zhou\*, Kang Chen, Lei Han\*

State Key Laboratory Base of Novel Functional Materials and Preparation Science, School of  
Materials Science and Chemical Engineering, Ningbo University, Ningbo, Zhejiang 315211,  
China. Email: hanlei@nbu.edu.cn

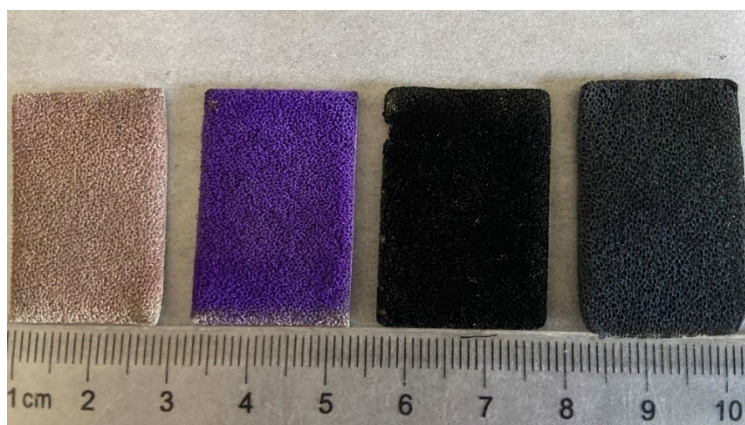

**Fig. S1.** Photography of CoCH, CoCH@ZIF-67,  $\text{Co}_9\text{S}_8$ ,  $\text{NiCo}_2\text{S}_4$  on the Ni Foam.

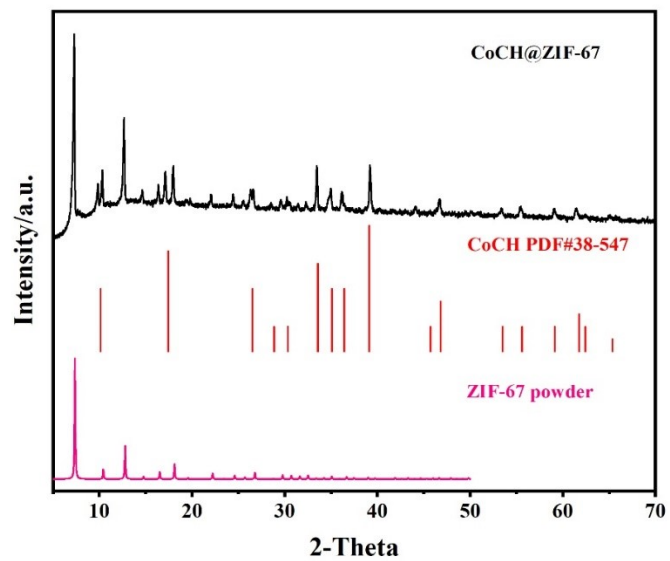

**Fig. S2.** XRD pattern of CoCH@ZIF-67.

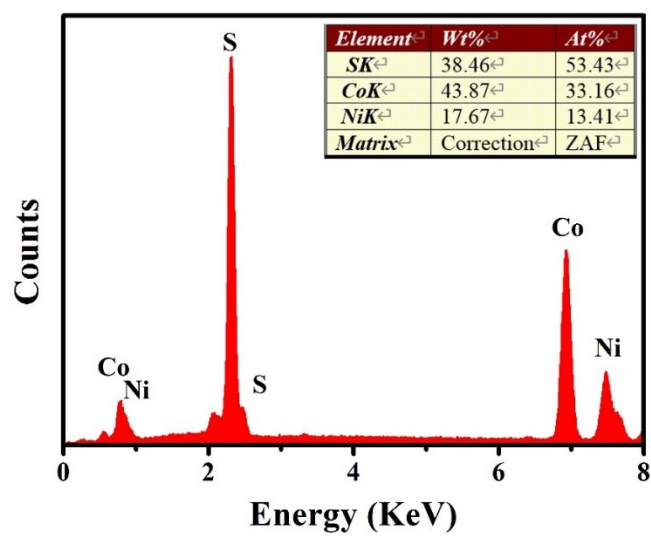

Fig. S3. EDS of NiCo<sub>2</sub>S<sub>4</sub>/NF.

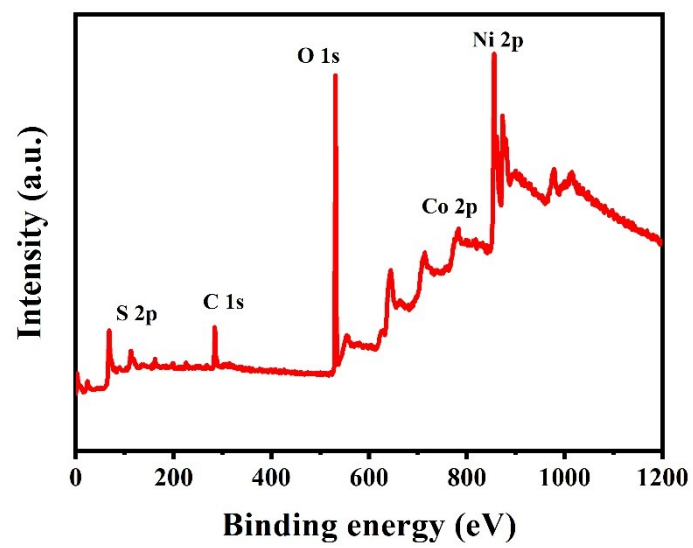

**Fig. S4.** Survey spectra of NiCo<sub>2</sub>S<sub>4</sub>/NF.

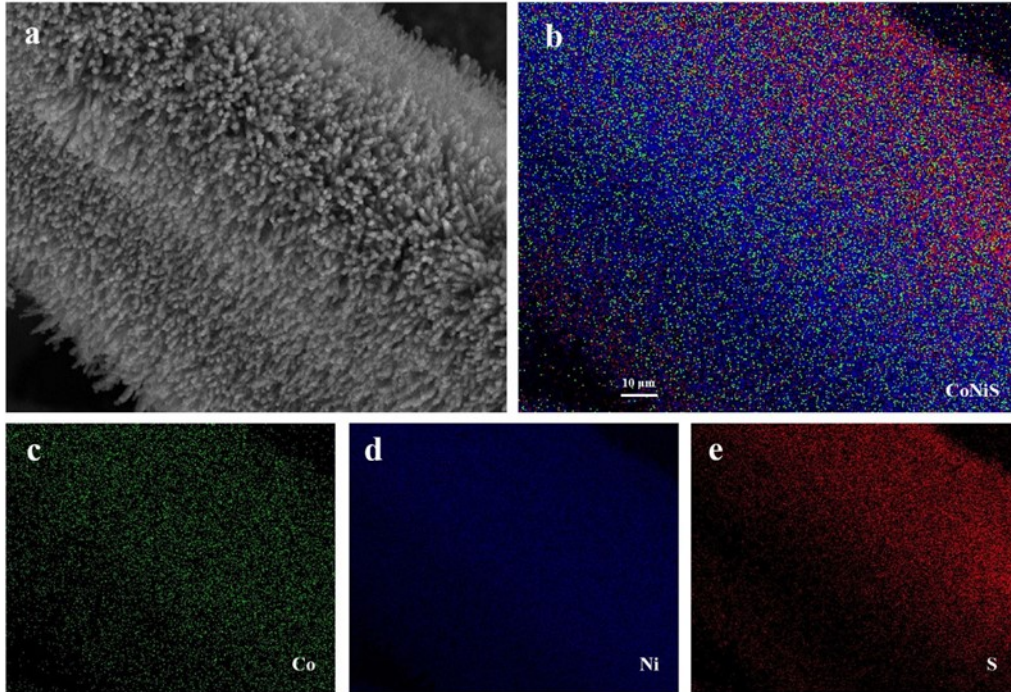

**Fig. S5.** The overall distribution of elements of NiCo<sub>2</sub>S<sub>4</sub>/NF

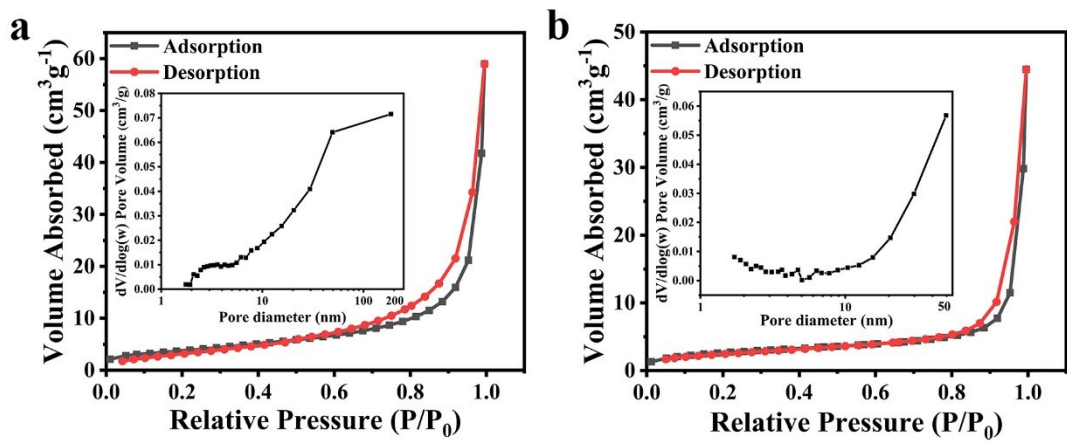

**Fig. S6.** (a)  $\text{N}_2$  adsorption-desorption isotherm curve and pore size distribution curve of  $\text{NiCo}_2\text{S}_4/\text{NF}$ . (b)  $\text{N}_2$  adsorption-desorption isotherm curve and pore size distribution curve of  $\text{Co}_9\text{S}_8/\text{NF}$ .

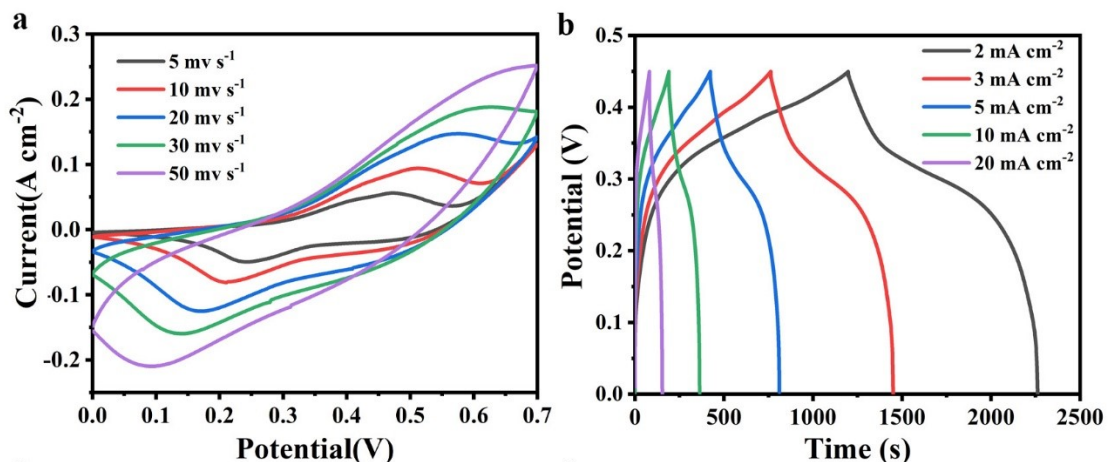

**Fig. S7.** (a) CV curves of Co<sub>9</sub>S<sub>8</sub>/NF at different scan rates; (b) GCD curve of Co<sub>9</sub>S<sub>8</sub>/NF at different current densities.

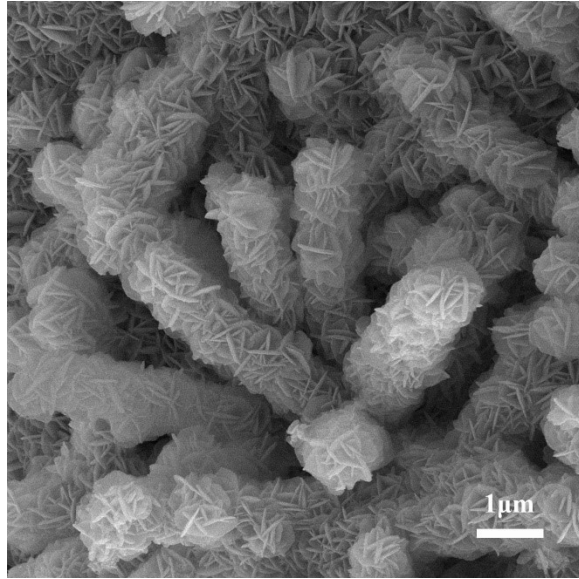

**Fig. S8.** SEM image of NiCo<sub>2</sub>S<sub>4</sub>/NF after cycling test.



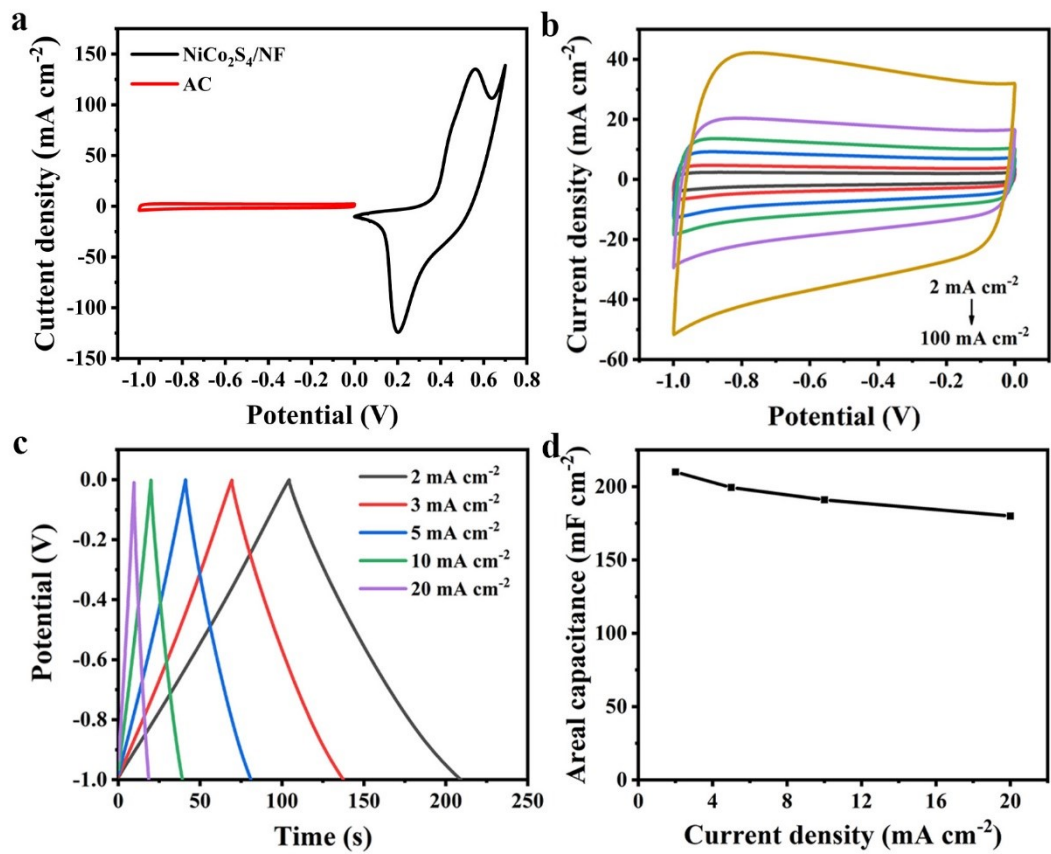

**Fig. S9.** (a) CV curves of NiCo<sub>2</sub>S<sub>4</sub>/NF and AC at a scan rate of 5 mV s<sup>-1</sup>; (b) CV curves of AC at different scan rates; (c) GCD curves of AC at different current densities; (d) Specific capacitances of AC.

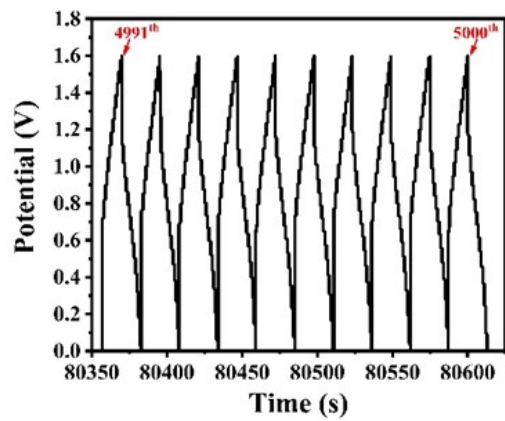

**Fig. S10.** Cycling performance of ACS device.
